# Supplementary material
Source: Springer Nature journal article supplement (https://www.springermedizin.de/resource/supplementary/12882_2014_894_MOESM3_ESM.pdf/9454552)

| NGAL (ng/ml) | no AKI   | AKIN 1     | AKIN 2     | AKIN 3     |
|--------------|----------|------------|------------|------------|
| 24 h         | 141 ±209 | 1205 ±1186 | 1152 ±800  | 1217 ±814  |
| 48 h         | 79 ±109  | 647 ±756   | 3468 ±1971 | 1623 ±783  |
| 96 h         | 18 ±12   | 495 ±563   | 2674 ±1616 | 2270 ±2132 |

**A**

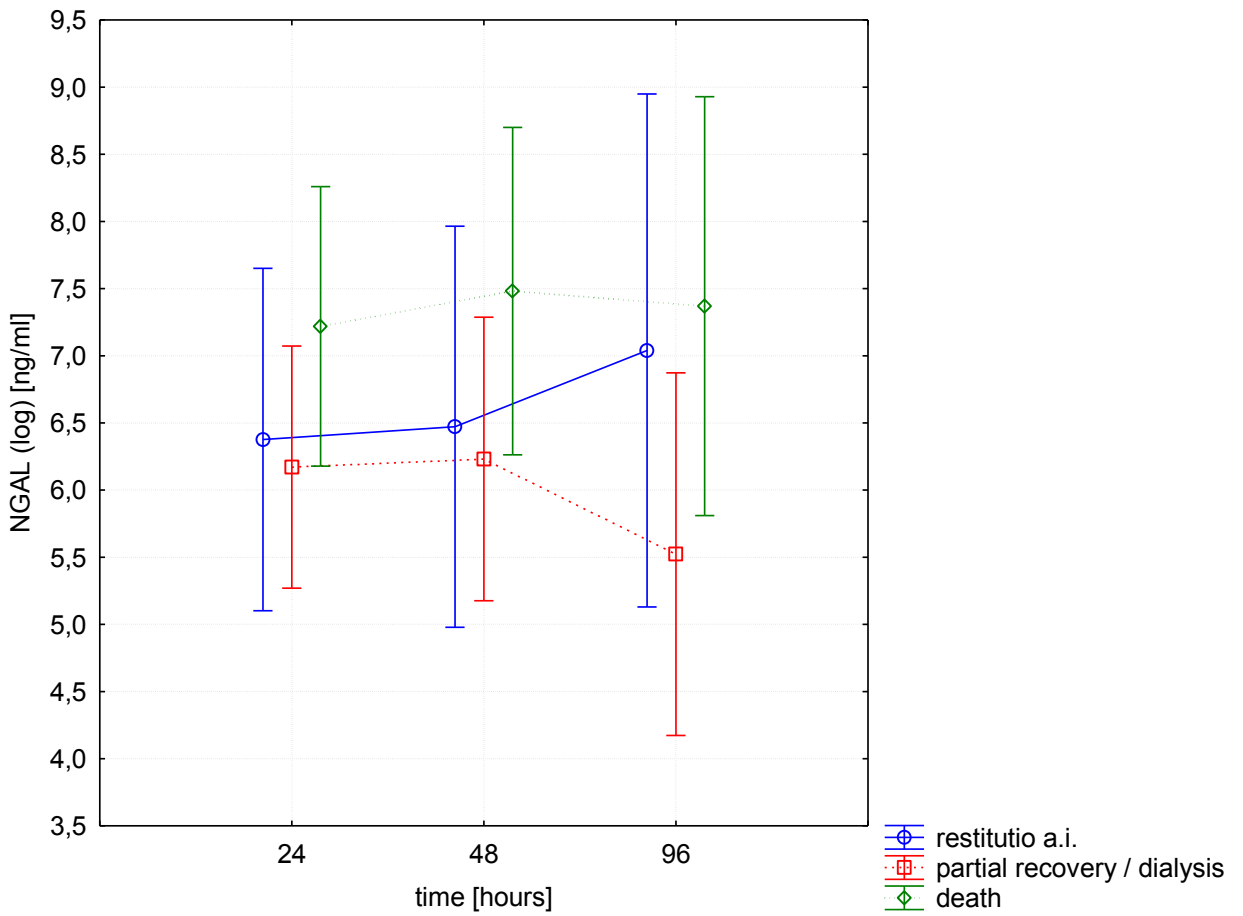

**B**

Supplement: MOESM3 [file 9454552]
